# Supplementary material
Source: PubMed Central journal article supplement (PMC4637252)
Supplement: NIHMS722872-supplement-1.pdf [file NIHMS722872-supplement-1.pdf]

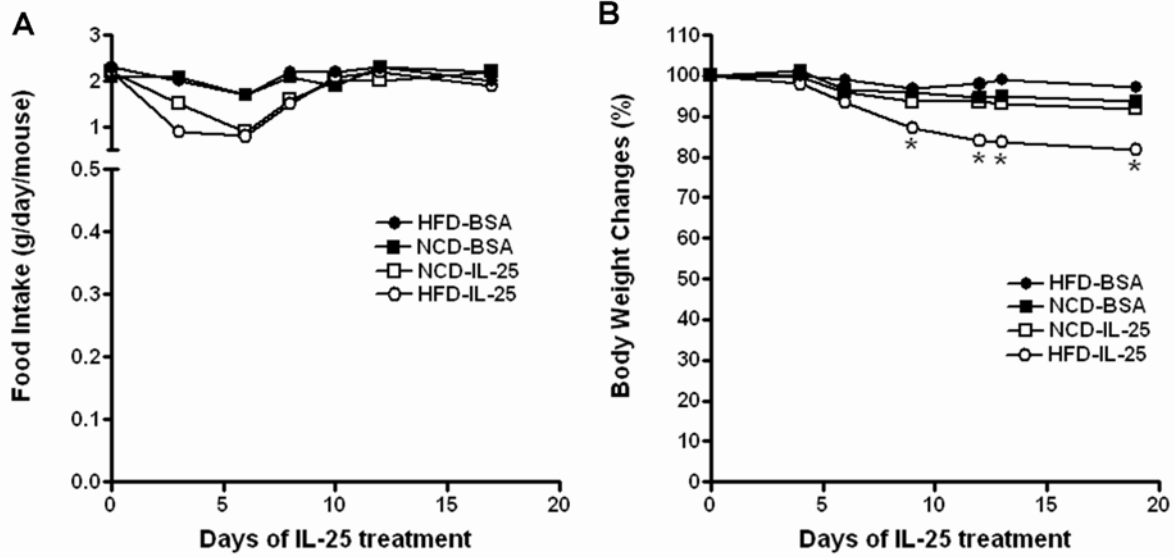

**Figure S1. Administration of IL-25 affects the food intake and body weight.** Mice were fed the high-fat diet (HFD) or normal control diet (NCD) for ~14 weeks, re-grouped, and then received injections of IL-25 or BSA for three weeks. Food intake (A) and body weight (B) were monitored during the course of IL-25/BSA treatment. Data shown are average food intake per mouse per day (A) or mean  $\pm$  SEM for body weight (B). \*  $P < 0.05$  versus HFD-BSA.

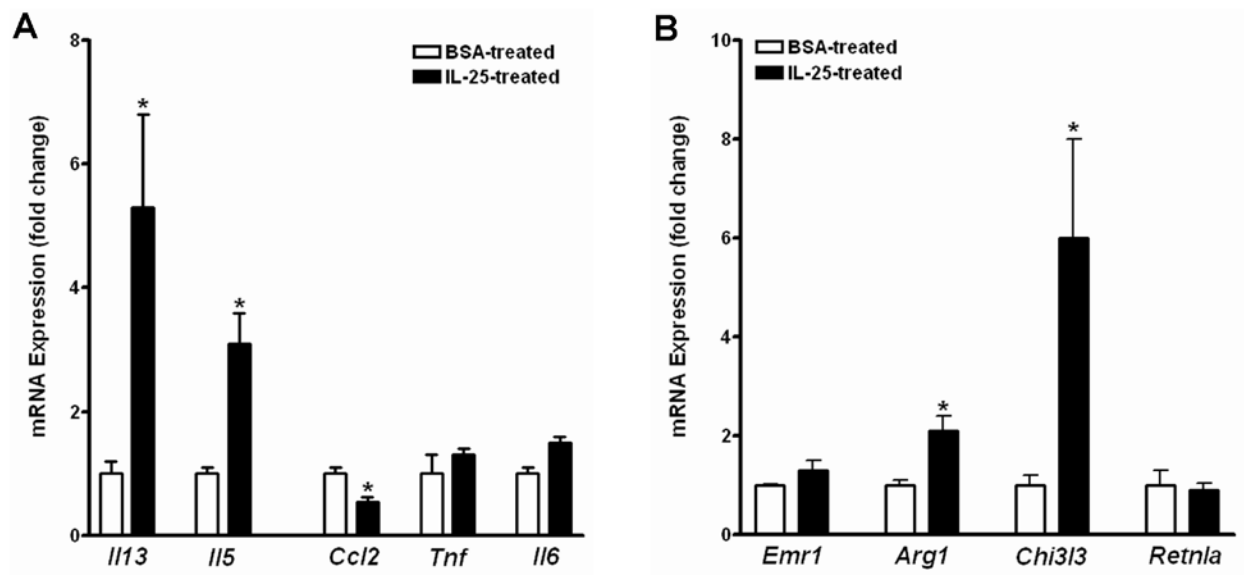

**Figure S2. Administration of IL-25 to mice fed a normal control diet induces a type 2 cytokine response and alternative activation of Kupffer cell/macrophage in the liver.** Mice were fed a normal control diet for 14 weeks, re-grouped, and then received injections of IL-25 or BSA for three weeks. (A) Hepatic expression of cytokines; (B) Hepatic expression of markers for Kupffer cell/macrophage activation. The fold changes are relative to BSA-treated after normalization to 18s rRNA. Data shown are mean  $\pm$  SEM. \* $P < 0.05$  versus respective BSA-treated.

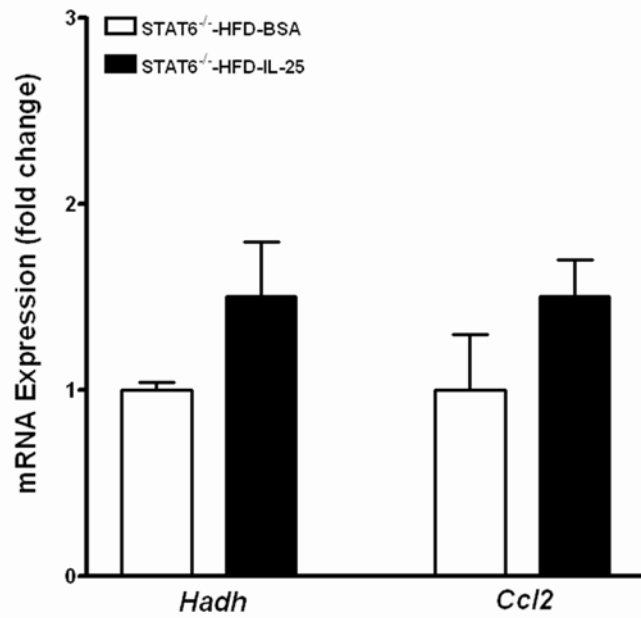

**Figure S3. Administration of IL-25 does not alter the expression of *Hadh* and *Ccl2* in mice deficient in STAT6.** STAT6<sup>-/-</sup> mice were fed a high-fat diet (HFD) for ~14 weeks, re-grouped, treated with IL-25 or BSA for three weeks. Hepatic gene expression of *Hadh* and *Ccl2* was examined by qPCR. The fold changes are relative to STAT6<sup>-/-</sup>-HFD-BSA mice after normalization to 18s rRNA. Data shown are mean ± SEM.

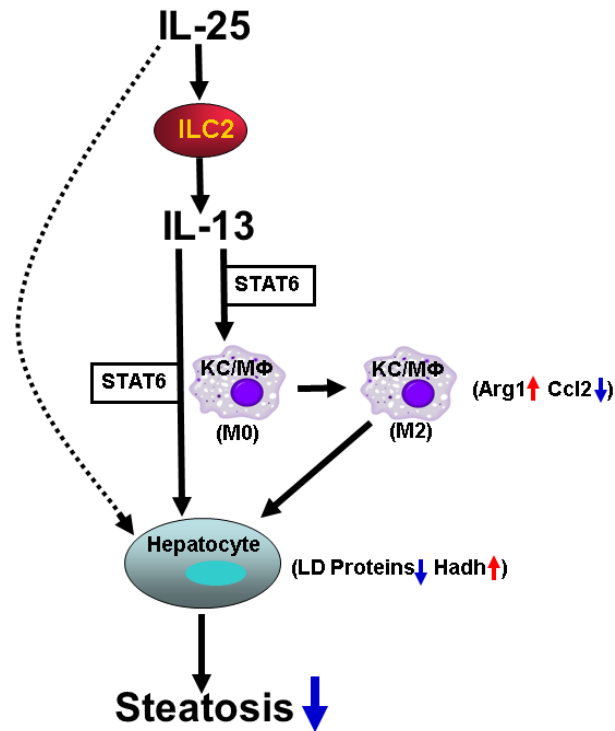

**Figure S4. Hypothetical model of IL-25 on hepatic steatosis.** IL-25 in the liver stimulates ILC2 to release IL-13 that in turn acts on hepatocytes as well as Kupffer cells via STAT6-dependent pathways, which leads to alterations in the expression of LD-associated proteins and factors that control lipid metabolic pathways thereby decreasing hepatic steatosis.
